# Supplementary material for: Conservative treatment of partial-thickness rotator cuff tears and tendinopathy with platelet-rich plasma: a systematic review and meta-analysis
Source: bioRxiv or medRxiv preprint supplement (doi:10.1101/2020.12.19.20248575), 2020-12-22

**Appendix.** the graph shows forest plots of meta-analysis detailing mean differences comparing PRP injection with other conservative managements for CMS at short-term (6±1 months) and long-term (≥1 year) follow-up (A). (B) and (C) show the meta and sensitivity analysis of SPADI, respectively. (D) and (E) represent the meta and sensitivity analysis of ASES score, respectively. PRP: platelet-rich plasma, CMS: Constant-Murley score, SPADI: Shoulder Pain and Disability Index, ASES: American Shoulder and Elbow Surgeons.

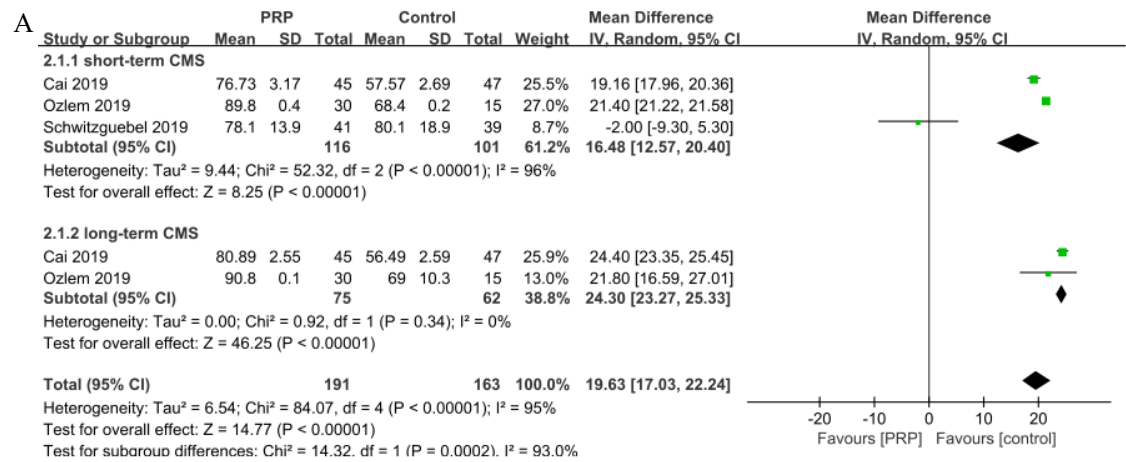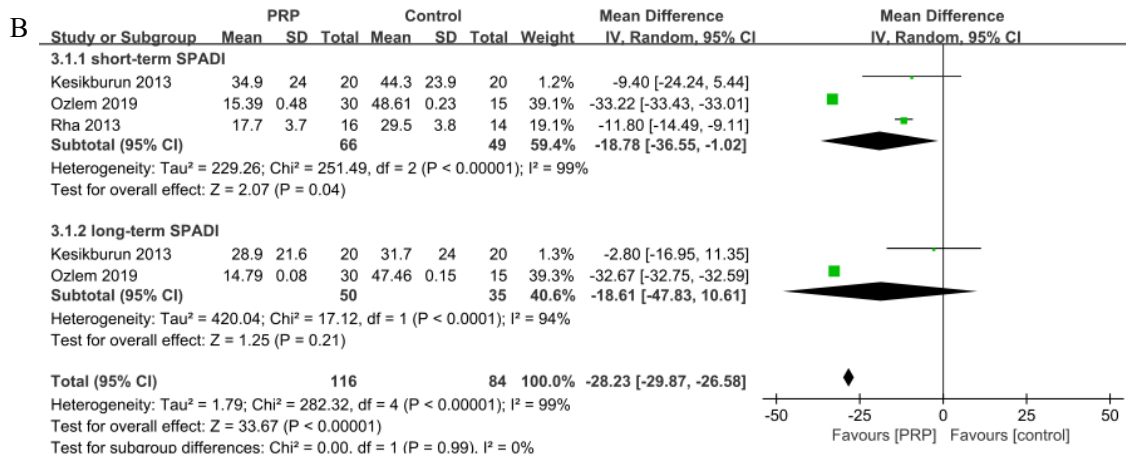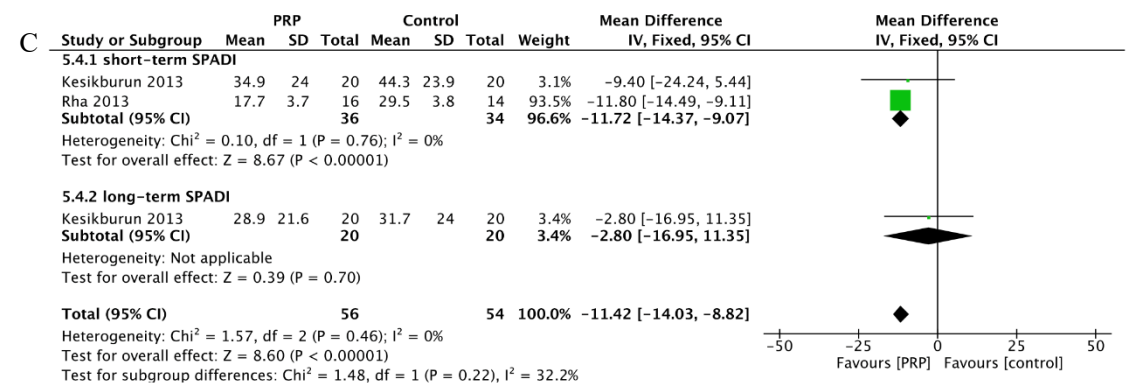

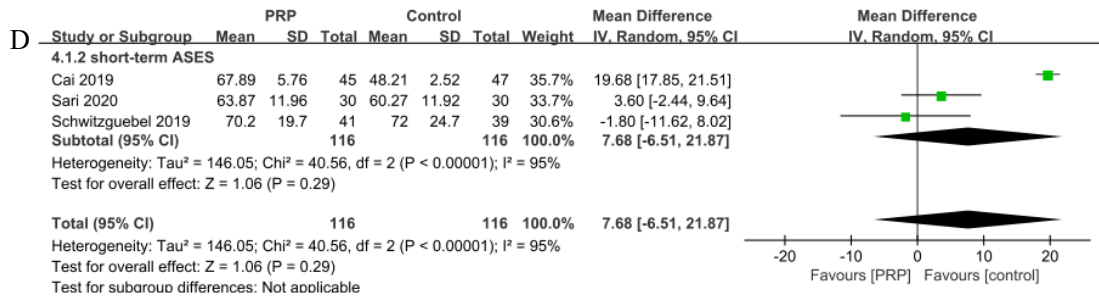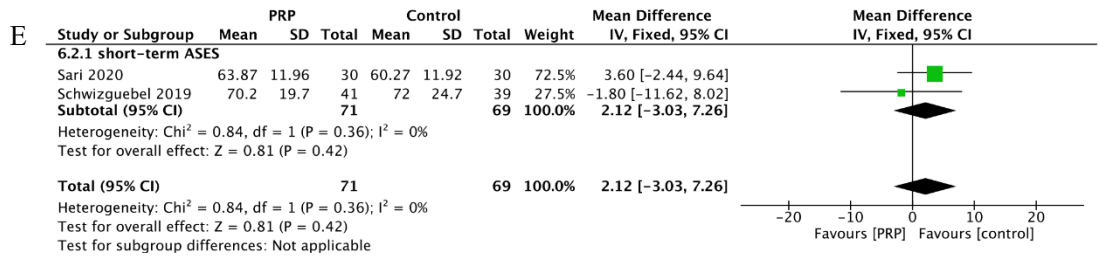

Supplement: Supplementary file [file media-1.pdf]
